# Supplementary material for: Medicinal cannabis: knowledge, beliefs, and attitudes of Colombian psychiatrists
Source: Springer Nature journal article supplement (doi:10.1186/s42238-021-00083-z), 2021-07-05
Supplement: MOESM1 [file 42238_2021_83_MOESM1_ESM-1.pdf]

## Medicinal Cannabis Survey

*This survey is oriented to determine your knowledge and attitudes towards medicinal cannabis use (therapy based on cannabis plant, its preparations, or active principles, called cannabinoids, including tetrahydrocannabinol (THC), cannabidiol (CBD) and cannabinol (CBN) - among others, as therapy to treat some diseases or relieve symptoms). By entering your answers, you agree to be part of this study.*

e-mail address

Select your age group (years)

<35      35–44      45–54      55–64      >65

Gender

Female

Male

In which city do you work?

How many years have you been practicing as a specialist?

<5 years

5 – 10 years

>10 years

Agree

Neutral

Disagree

Medicinal cannabis should be available for certain medical conditions

I have patients who could benefit from medicinal cannabis

I would like to have the ability to prescribe medicinal cannabis

I would feel comfortable discussing medicinal cannabis with my patients

I know how to help patients legally access medicinal cannabis

I understand the current status of the legislation regarding medicinal cannabis in my country

I know the therapeutic effects of medicinal cannabis

I know what the different products and presentations of medicinal cannabis are

**I support the use of medicinal cannabis in:**

Agree

Neutral

Disagree

Post-traumatic stress disorder

Anxiety

Sleep disorders

Depression

Schizophrenia

Agitation in dementia

Chronic cancer pain

Intractable epilepsy

Nausea due to chemotherapy

Spasticity in multiple sclerosis

Cachexia

Cancer (Anti-tumoral)

Neuropathic pain

Chronic non-cancer pain

**Medicinal cannabis is more harmful than**

Agree

Neutral

Disagree

Antidepressants

Antipsychotic

Benzodiazepine

Opioids

Chemotherapy

Statins
